# Supplementary material for: Taking Trade-offs Seriously: Examining the Contextually Contingent Relationship Between Social Outreach Intensity and Financial Sustainability in Global Microfinance
Source: Atypon-hosted journal article supplement (doi:10.1287/orsc.2017.1188), 2018-04-30
Supplement: orsc.2017.1188-sm.pdf [file orsc.2017.1188-sm.pdf]

## Online Appendix. Treatment Effects based on Matching

| Average Treatment Effects | Baseline             | Discrimination     |                    | Market Institutions |                   | Microfinance Institutions |                   | Professional Management |                   |
|---------------------------|----------------------|--------------------|--------------------|---------------------|-------------------|---------------------------|-------------------|-------------------------|-------------------|
|                           |                      | 5th Percentile     | 95th Percentile    | 10th Percentile     | 90th Percentile   | 5th Percentile            | 95th Percentile   | 5th Percentile          | 95th Percentile   |
| Poverty focus             | -0.062***<br>(0.006) | -0.055*<br>(0.024) | -0.075*<br>(0.030) | -0.039+<br>(0.027)  | -0.019<br>(0.015) | -0.075*<br>(0.034)        | -0.024<br>(0.038) | -0.050*<br>(0.026)      | 0.052*<br>(0.027) |

Note . For market institutions, we used 10th and 90th percentile instead of 5th and 95th percentile as the cutoff in order to make the matching possible.
